# Supplementary material for: Incidence, Etiology, and Risk Factors of Clinical Mastitis in Dairy Cows under Semi-Tropical Circumstances in Chattogram, Bangladesh
Source: MDPI journal article supplement (doi:10.3390/ani11082255), 2021-07-30
Supplement: s1 [file s1]

**Table S1.** Descriptive analysis of farmer's perception towards mastitis and treatment strategies for clinical mastitis

| Variables                                                      | Categories                                 | Frequency (%) |
|----------------------------------------------------------------|--------------------------------------------|---------------|
| What do you think about CM? (n <sup>1</sup> =30)               | Unhygienic condition causes mastitis       | 9 (30)        |
|                                                                | Milking fault causes mastitis              | 9 (30)        |
|                                                                | Management fault causes mastitis           | 3 (10)        |
|                                                                | This is a bacterial infection              | 3 (10)        |
|                                                                | This results in udder swelling             | 2 (6.7)       |
|                                                                | This is a water borne infection            | 1 (3.3)       |
|                                                                | High yielding cows are repeatedly affected | 1 (3.3)       |
|                                                                | This results in milk color change          | 1 (3.3)       |
|                                                                | Mysterious thing                           | 1 (3.3)       |
| What are the commonly used antibiotics? (n <sup>1</sup> =91)   | Gentamycin                                 | 20 (22.0)     |
|                                                                | Ceftriaxone                                | 17 (18.7)     |
|                                                                | Amoxycillin                                | 11 (12.1)     |
|                                                                | Colistin                                   | 6 (6.6)       |
|                                                                | Kanamycin                                  | 5 (5.5)       |
|                                                                | Neomycin                                   | 5 (5.5)       |
|                                                                | Ciprofloxacin                              | 4 (4.4)       |
|                                                                | Oxy-tetracycline                           | 4 (4.4)       |
|                                                                | Streptomycin-Penicillin                    | 4 (4.4)       |
|                                                                | Ampicillin                                 | 3 (3.3)       |
|                                                                | Amoxicillin-Cloxacillin                    | 2 (2.2)       |
|                                                                | Gentamycin intra-mammary tube              | 2 (2.2)       |
|                                                                | Penicillin                                 | 2 (2.2)       |
|                                                                | Sulfamethoxazole-trimethoprim              | 2 (2.2)       |
|                                                                | Ampicillin-Gentamycin                      | 1 (1.1)       |
|                                                                | Ceftiofur                                  | 1 (1.1)       |
|                                                                | Marbofloxacin                              | 1 (1.1)       |
|                                                                | Sulfadimidine-Trimethoprim                 | 1 (1.1)       |
| What are the supporting drugs used? (n <sup>1</sup> =28)       | Probiotics                                 | 15 (53.6)     |
|                                                                | No supportive drugs                        | 7 (25.0)      |
|                                                                | NSAID                                      | 2 (7.1)       |
|                                                                | Homeopathic                                | 1 (3.6)       |
|                                                                | Antihistamines                             | 1 (3.6)       |
|                                                                | Dexamethasone                              | 1 (3.6)       |
|                                                                | Vitamin B-complex                          | 1 (3.6)       |
| Who prescribes the drugs? (n <sup>1</sup> =24)                 | Self then doctor                           | 11 (45.8)     |
|                                                                | Self                                       | 9 (37.5)      |
|                                                                | Veterinarian                               | 3 (12.5)      |
|                                                                | Animal husbandry officer                   | 1 (4.2)       |
| What are the traditional treatments used? (n <sup>1</sup> =34) | Phytolacca (Homeopathic drug)              | 11 (32.4)     |
|                                                                | Ice                                        | 4 (11.8)      |
|                                                                | No traditional treatment                   | 3 (8.8)       |
|                                                                | Napthalene                                 | 3 (8.8)       |
|                                                                | Cold water                                 | 2 (5.9)       |

|                                          |         |
|------------------------------------------|---------|
| Egg yolk emulsion                        | 2 (5.9) |
| Belladonna (Homeopathic drug)            | 2 (5.9) |
| Calcarea sulf (Homeopathic drug)         | 2 (5.9) |
| Walking                                  | 1 (2.9) |
| Heat                                     | 1 (2.9) |
| Turmeric                                 | 1 (2.9) |
| Coconut oil                              | 1 (2.9) |
| <i>Aurum mureacum</i> (Homeopathic drug) | 1 (2.9) |

---

*%. Percentages; NSAID: Non-steroidal anti-inflammatory drugs n<sup>1</sup>=Total number of replies from 24 farms against each question. If one farmers mentioned multiple answers to a question, the replies were listed and counted in the distinguished category under each question.*
